# Supplementary material
Source: Research Square preprint supplement (doi:10.21203/rs.3.rs-9825796/v1)
Supplement: Supplementary file 1 [file 2561f7daec7e1dbaa99c565e.docx]

Table.6 Variables associated with marking orientation grade in multivariable ordinal logistic regression

| **Variable** | **β** | **SE** | **OR** | **95% CI** | **P value** |
| --- | --- | --- | --- | --- | --- |
| Injection concentration | 0.840 | 0.939 | 2.32 | 0.37–14.57 | 0.371 |
| Injection dose | 15.405 | 8.971 | 4.90 × 10^6 | 0.11–2.12 × 10^14 | 0.086 |
| Injection timing: 1 day vs 2 days | 2.078 | 0.795 | 7.99 | 1.68–37.94 | 0.009 |

SE, standard error; OR, odds ratio; CI, confidence interval.
