# Supplementary material
Source: Research Square preprint supplement (doi:10.21203/rs.3.rs-9825796/v1)
Supplement: Supplementary file 2 [file 29d7491187f0131e8d36f6e0.docx]

Table.4 Variables associated with visibility grade in multivariable ordinal logistic regression

| **Variable** | **β** | **SE** | **OR** | **95% CI** | **P value** |
| --- | --- | --- | --- | --- | --- |
| Injection concentration | -0.013 | 0.788 | 0.99 | 0.21–4.63 | 0.987 |
| Injection dose | 12.960 | 7.932 | 4.25 × 10^5 | 0.08–2.40 × 10^12 | 0.102 |
| Injection timing: 1 day vs 2 days | 0.651 | 0.667 | 1.92 | 0.52–7.09 | 0.329 |

SE, standard error; OR, odds ratio; CI, confidence interval.
