# Supplementary material
Source: Research Square preprint supplement (doi:10.21203/rs.3.rs-9825796/v1)
Supplement: Supplementary file 3 [file 82ced62e5de94b0b3a63e07c.docx]

Table.5 Variables associated with marking orientation grade in multivariable ordinal logistic regression

| **Variable** | **β** | **SE** | **OR** | **95% CI** | **P value** |
| --- | --- | --- | --- | --- | --- |
| Injection concentration | -1.183 | 0.987 | 0.31 | 0.04–2.12 | 0.230 |
| Injection dose | -7.979 | 8.674 | 3.43 × 10^-4 | 1.43 × 10^-11–8.26 × 10^3 | 0.358 |
| Injection timing: 1 day vs 2 days | 0.176 | 0.726 | 1.19 | 0.29–4.95 | 0.809 |

SE, standard error; OR, odds ratio; CI, confidence interval.
