# Supplementary material
Source: Research Square preprint supplement (doi:10.21203/rs.3.rs-9825796/v1)
Supplement: Supplementary file 4 [file a929772973af34974626a34b.docx]

Table.3Comparison of intraoperative ICG marking outcomes according to ICG dose

| Outcomes | High ICG dose (n=6) | Low ICG dose (n=34) | P value |
| --- | --- | --- | --- |
| Marking visibility 0.642 | | | |
| Grade 0 | 0 | 6 (17.6%) |  |
| Grade 1 | 1 (16.7%) | 4 (11.8%) |
| Grade 2 | 0 | 6 (17.6%) |
| Grade 3 | 3 (50%) | 12 (35.3%) |
| Grade 4 | 2 (33.3%) | 6 (17.6%) |
| Marking orientation 0.422 | | | |
| Grade 0 | 3 (50%) | 16 (7.1%) |  |
| Grade 1 | 0 | 7 (20.6%) |  |
| Grade 2 | 3 (50%) | 7 (20.6%) |  |
| Grade 3 | 0 | 4 (11.8%) |  |
| Catergorized marking area 0.022 | | | |
| unmeasurable | 0 | 11 (32.4%) |  |
| 0＜Area≤0.5cm² | 1 (16.7%) | 0 |
| 0.5cm²＜Area ≤1.0cm² | 1 (16.7%) | 13 (38.2%) |
| Area＞1cm² | 4 (66.7%) | 10 (29.4%) |
