# Supplementary material
Source: Research Square preprint supplement (doi:10.21203/rs.3.rs-9825796/v1)
Supplement: Supplementary file 5 [file aed28855191693c5f5fa5b5b.doc]

Table.1 Comparison of intraoperative ICG marking outcomes according to injection timing

| Outcomes | 1 day before surgery (n=27) | 2 days before surgery (n=13) | P value |
| --- | --- | --- | --- |
| Marking visibility 0.629 | | | |
| Grade 0 | 3 (11.1%) | 3 (23.1%) |  |
| Grade 1 | 3 (11.1%) | 2 (15.4%) |
| Grade 2 | 5 (18.5%) | 1 (7.7%) |
| Grade 3 | 11 (40.7%) | 4 (31.0%) |
| Grade 4 | 5 (18.5%) | 3 (23.1%) |
| Marking orientation 0.648 | | | |
| Grade 0 | 11 (40.8%) | 8 (61.5%) |  |
| Grade 1 | 6 (22.2%) | 1 (7.7%) |  |
| Grade 2 | 7 (25.9%) | 3 (23.1%) |  |
| Grade 3 | 3 (11.1%) | 1(7.7%) |  |
| Categorized marking area 0.109 | | | |
| unmeasurable | 5 (18.5%) | 6 (46.2%) |  |
| 0＜Area≤0.5cm² | 0 | 0 |
| 0.5cm²＜Area ≤1.0cm² | 10 (37.1%) | 5 (38.4%) |
| Area＞1cm² | 12 (44.4%) | 2 (15.4%) |
