# Supplementary material
Source: Research Square preprint supplement (doi:10.21203/rs.3.rs-9825796/v1)
Supplement: Supplementary file 6 [file bf55f2c87c0ec4753d02f69f.docx]

Table.2 Comparison of intraoperative ICG marking outcomes according to ICG concentration

| Outcomes | High concentration group (n=25) | Low concentration group (n=15) | P value |
| --- | --- | --- | --- |
| Marking visibility 0.222 | | | |
| Grade 0 | 3 (12%) | 3 (20%) |  |
| Grade 1 | 1 (4%) | 4 (26.7%) |
| Grade 2 | 5 (20%) | 1 (6.7%) |
| Grade 3 | 11(44%) | 4 (26.7%) |
| Grade 4 | 5 (20%) | 3 (20%) |
| Marking orientation 0.152 | | | |
| Grade 0 | 10 (40%) | 9 (60%) |  |
| Grade 1 | 3 (12%) | 4 (26.7%) |  |
| Grade 2 | 8 (32%) | 2 (13.3%) |  |
| Grade 3 | 4 (16%) | 0 |  |
| Categorized Marking area（cm²） 0.749 | | | |
| unmeasurable | 7 (28%) | 4 (26.7%) |  |
| 0＜Area≤0.5cm² | 0 | 1 (6.7%) |
| 0.5cm²＜Area ≤1.0cm² | 9 (36%) | 5 (33.3%) |
| Area＞1cm² | 9 (36%) | 5 (33.3%) |
